# Supplementary material for: Intrinsic magnetism in semiconducting bulk amorphous tellurium
Source: Royal Society of Chemistry journal article supplement (doi:10.1039/d4tc03704a), 2024-12-23
Supplement: d4tc03704a1.pdf [file d4tc03704a1.pdf]

# Supplementary Information for “Intrinsic Magnetism in Semiconducting Bulk Amorphous Tellurium”

*Jongchan Kim<sup>1,2</sup>, Myung Mo Sung<sup>2</sup> and Kyeongjae Cho<sup>1\*</sup>*

<sup>1</sup>Department of Materials Science and Engineering, University of Texas at Dallas, Richardson, Texas 75080, USA

<sup>2</sup>Department of Chemistry, Hanyang University, Seoul 04763, Republic of Korea

\*To whom correspondence should be addressed. E-mail: [kjcho@utdallas.edu](mailto:kjcho@utdallas.edu)

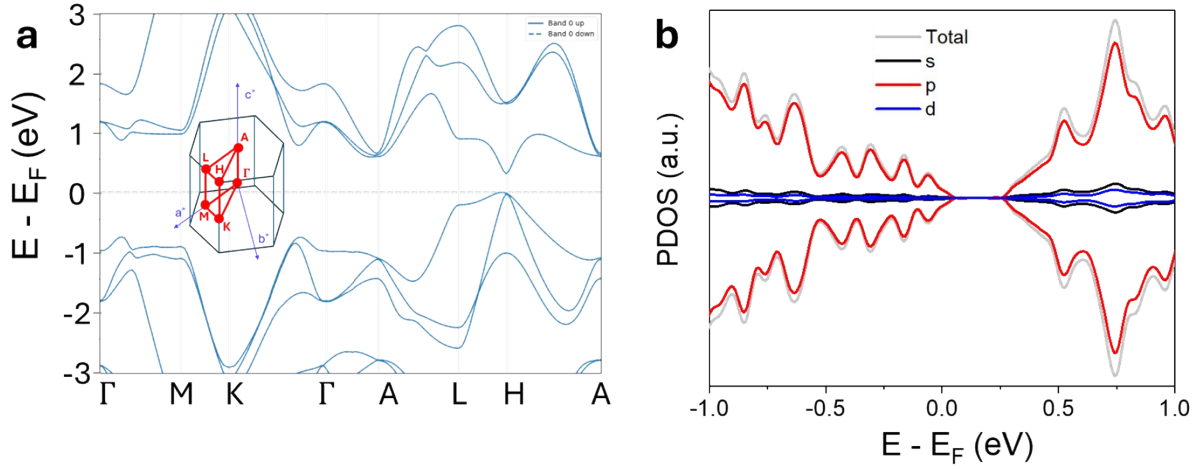

**Figure S1.** Band structure and orbital-resolved projected density states (PDOS) of crystalline Te. The inset in (a) represents the high-symmetric  $k$ -points within the first Brillouin zone of crystalline Te.

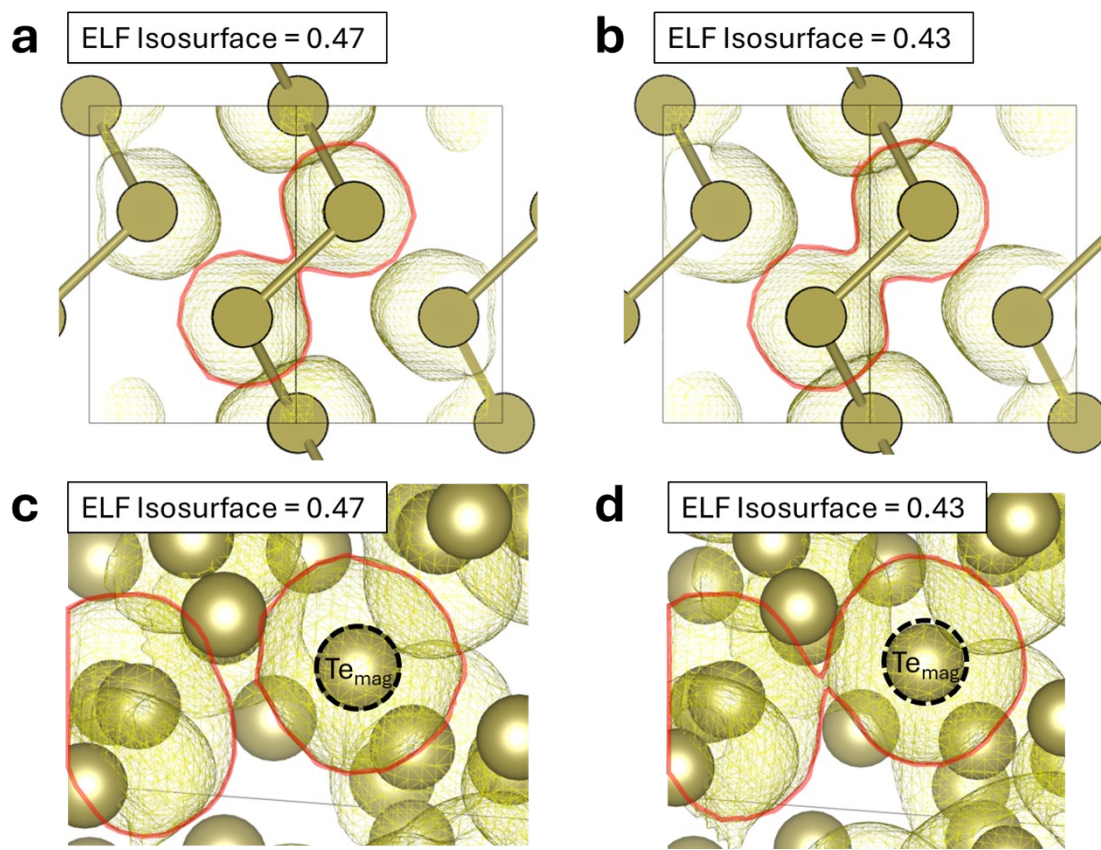

**Figure S2. Electron localization function (ELF) distribution.** (a,b) In crystalline Te (c-Te), ELF distributions overlap at an isosurface level of 0.47 (a) and intensify at 0.43 (b). (c,d) In amorphous Te (a-Te), no overlap is observed at 0.47 (c), but overlap occurs at the lower ELF level of 0.43 (d), indicating localized behavior and partial bond breaking in a-Te.
